# Supplementary material for: Nanoparticle supported, magnetically separable manganese porphyrin as an efficient retrievable nanocatalyst in hydrocarbon oxidation reactions
Source: Royal Society of Chemistry journal article supplement (doi:10.1039/c6ra02123a), 2016-01-01
Supplement: c6ra02123a1.pdf [file c6ra02123a1.pdf]

## Supplementary

### **Nanoparticle supported, magnetically separable manganese porphyrin as an efficient retrievable nanocatalyst in hydrocarbon oxidation reactions**

Mojtaba Bagherzadeh\* and Anahita Mortazavi-Manesh

*Chemistry Department, Sharif University of Technology, P.O. Box 11155-3615, Tehran, Iran.*

\*Corresponding author. Tel.: +98 21 66165354; fax: +98 21 66012983;

*E-mail address:* [bagherzadeh@sharif.edu](mailto:bagherzadeh@sharif.edu)

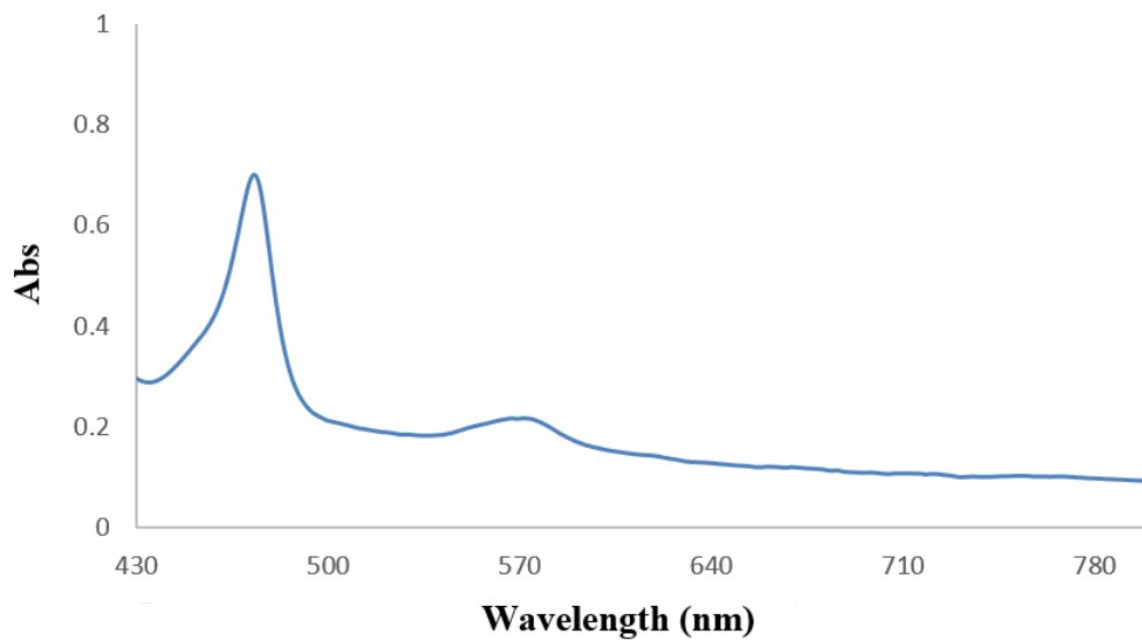

**Fig. S1** The UV-Vis spectrum of homogeneous Mn(TPFPP)OAc in CH<sub>2</sub>Cl<sub>2</sub>

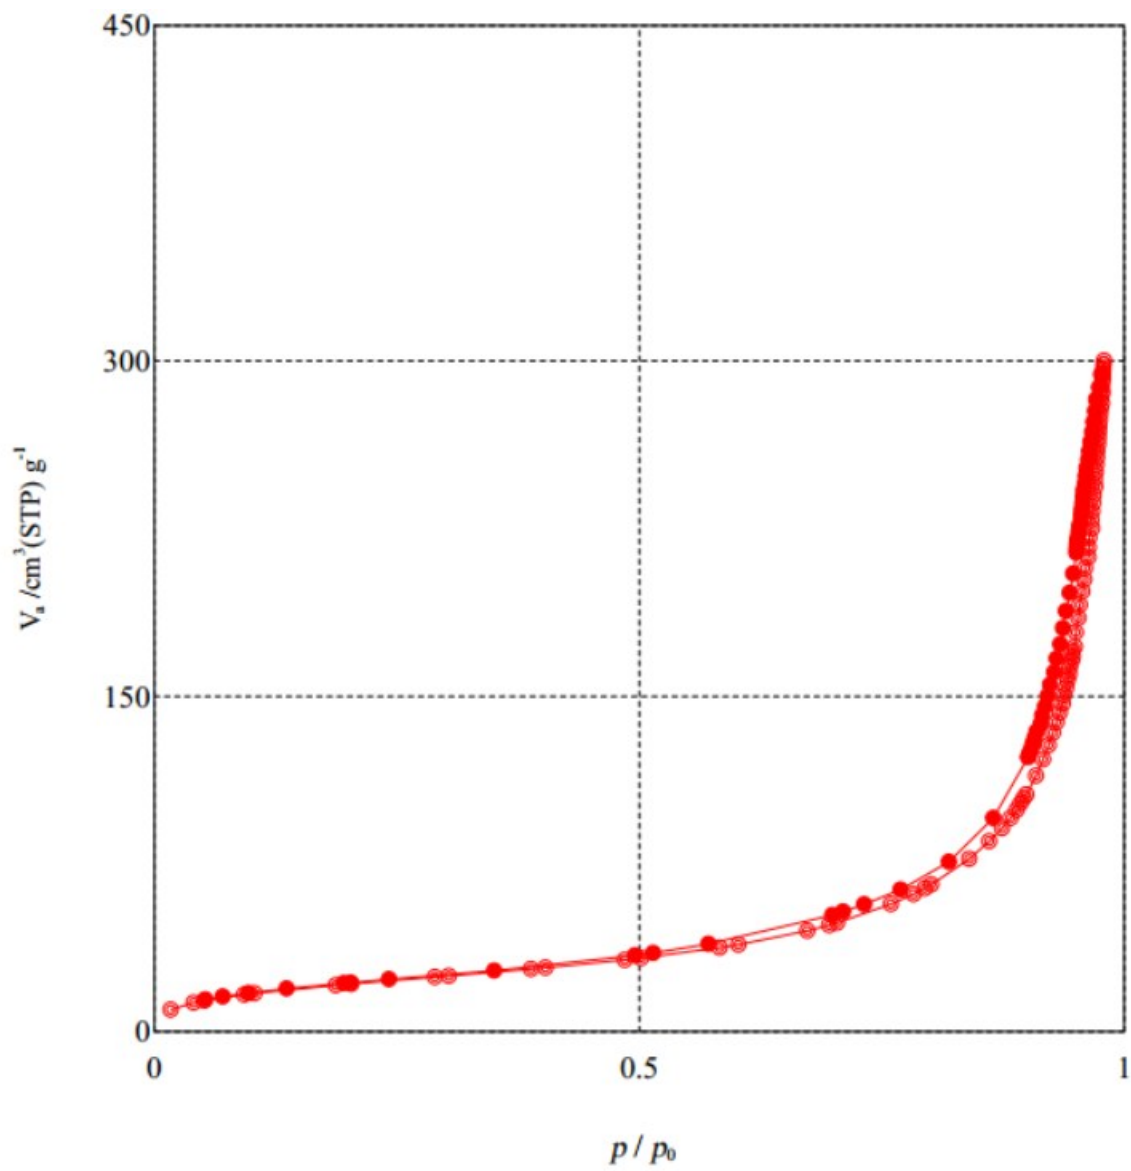

**Fig. S2**  $\text{N}_2$  adsorption-desorption isotherm of the nanocatalyst (**1**)
